# Supplementary material for: Survival, growth and carbon content in a forest plantation established after a clear-cutting in Durango, Mexico
Source: PeerJ. 2020 Aug 4;8:e9506. doi: 10.7717/peerj.9506 (PMC7413079; doi:10.7717/peerj.9506)
Supplement: Data S1 [file peerj-08-9506-s001.xlsx]

## Sheet: Hoja1
Site	Tree	Species	year	Length(µm)	Length(mm)	Length(cm)	DBSC	DBCC	Biomass/DB	Biomass/year	Carbon/DB	Carbon/year
1	1	P. durangensis	1	2161	2.161	0.2161	0.2161	0.3561	0.00143186	0.00143186	0.000721083	0.000721083	DBSC = Basal Diameter without bark
1	1	P. durangensis	2	4062	4.062	0.4062	0.6223	0.7623	0.00996358	0.00853173	0.00501766	0.00429658	DBCC = Basal Diameter with bark
1	1	P. durangensis	3	9107.5	9.1075	0.91075	1.53305	1.67305	0.073881	0.0639174	0.0372065	0.0321888
1	1	P. durangensis	4	12100.5	12.1005	1.21005	2.7431	2.8831	0.295763	0.221882	0.148946	0.11174
1	1	P. durangensis	5	14447	14.447	1.4447	4.1878	4.3278	0.832858	0.537095	0.419427	0.270481
1	1	P. durangensis	6	17618	17.618	1.7618	5.9496	6.0896	1.9889	1.15604	1.00161	0.582183
1	1	P. durangensis	7	11519.5	11.5195	1.15195	7.10155	7.24155	3.09308	1.10418	1.55768	0.556067
2	2	P. durangensis	1	8600	8.6	0.86	0.86	0.97	0.0184135	0.0184135	0.00927305	0.00927305
2	2	P. durangensis	2	14482.5	14.4825	1.44825	2.30825	2.41825	0.188939	0.170525	0.0951495	0.0858765
2	2	P. durangensis	3	10592	10.592	1.0592	3.36745	3.47745	0.476891	0.287952	0.240162	0.145013
2	2	P. durangensis	4	13219.5	13.2195	1.32195	4.6894	4.7994	1.08408	0.607192	0.545944	0.305782
2	2	P. durangensis	5	8990	8.99	0.899	5.5884	5.6984	1.67925	0.59517	0.845672	0.299728
2	2	P. durangensis	6	11077.5	11.0775	1.10775	6.69615	6.80615	2.6409	0.96165	1.32996	0.484287
2	2	P. durangensis	7	20471	20.471	2.0471	8.74325	8.85325	5.16212	2.52122	2.59965	1.26969
3	3	P. durangensis	1	3888	3.888	0.3888	0.3888	0.4988	0.00338009	0.00338009	0.00170221	0.00170221
3	3	P. durangensis	2	6294.5	6.2945	0.62945	1.01825	1.12825	0.027066	0.0236859	0.0136304	0.0119282
3	3	P. durangensis	3	10472.5	10.4725	1.04725	2.0655	2.1755	0.144286	0.11722	0.0726623	0.0590319
3	3	P. durangensis	4	13650	13.65	1.365	3.4305	3.5405	0.499239	0.354954	0.251417	0.178755
3	3	P. durangensis	5	16510.5	16.5105	1.65105	5.08155	5.19155	1.32435	0.825109	0.666942	0.415525
3	3	P. durangensis	6	10746.5	10.7465	1.07465	6.1562	6.2662	2.13923	0.814882	1.07732	0.410375
3	3	P. durangensis	7	7420	7.42	0.742	6.8982	7.0082	2.84534	0.706115	1.43292	0.355599
4	4	P. durangensis	1	4868.5	4.8685	0.48685	0.48685	0.59685	0.00534046	0.00534046	0.00268945	0.00268945
4	4	P. durangensis	2	5658	5.658	0.5658	1.05265	1.16265	0.0292193	0.0238788	0.0147148	0.0120254
4	4	P. durangensis	3	11392	11.392	1.1392	2.19185	2.30185	0.166615	0.137396	0.0839075	0.0691927
4	4	P. durangensis	4	12773	12.773	1.2773	3.46915	3.57915	0.513248	0.346633	0.258472	0.174564
4	4	P. durangensis	5	19536	19.536	1.9536	5.42275	5.53275	1.55762	1.04437	0.784417	0.525945
4	4	P. durangensis	6	14166	14.166	1.4166	6.83935	6.94935	2.78484	1.22722	1.40245	0.618029
4	4	P. durangensis	7	9033	9.033	0.9033	7.74265	7.85265	3.80251	1.01767	1.91494	0.512499
5	5	P. durangensis	1	4683	4.683	0.4683	0.4683	0.6083	0.00560548	0.00560548	0.00282292	0.00282292
5	5	P. durangensis	2	6503.5	6.5035	0.65035	1.11865	1.25865	0.0357677	0.0301622	0.0180126	0.0151897
5	5	P. durangensis	3	12898	12.898	1.2898	2.40845	2.54845	0.215958	0.18019	0.108757	0.0907439
5	5	P. durangensis	4	16473	16.473	1.6473	4.05575	4.19575	0.769609	0.553651	0.387575	0.278819
5	5	P. durangensis	5	18670.5	18.6705	1.86705	5.9228	6.0628	1.96667	1.19706	0.990413	0.602838
5	5	P. durangensis	6	18381	18.381	1.8381	7.7609	7.9009	3.86235	1.89568	1.94508	0.954664
5	5	P. durangensis	7	18777	18.777	1.8777	9.6386	9.7786	6.65074	2.7884	3.34932	1.40424
6	6	P. durangensis	1	2291	2.291	0.2291	0.2291	0.3491	0.00136121	0.00136121	0.000685503	0.000685503
6	6	P. durangensis	2	2717	2.717	0.2717	0.5008	0.6208	0.00590376	0.00454255	0.00297313	0.00228763
6	6	P. durangensis	3	3865.5	3.8655	0.38655	0.88735	1.00735	0.0202749	0.0143712	0.0102105	0.00723732
6	6	P. durangensis	4	13237	13.237	1.3237	2.21105	2.33105	0.172056	0.151781	0.0866472	0.0764367
6	6	P. durangensis	5	16890.5	16.8905	1.68905	3.9001	4.0201	0.690132	0.518076	0.34755	0.260903
6	6	P. durangensis	6	17640.5	17.6405	1.76405	5.66415	5.78415	1.74441	1.05428	0.878486	0.530936
6	6	P. durangensis	7	18295.5	18.2955	1.82955	7.4937	7.6137	3.51451	1.77009	1.76991	0.891419
7	7	P. durangensis	1	7767.5	7.7675	0.77675	0.77675	0.90675	0.0155059	0.0155059	0.00780878	0.00780878
7	7	P. durangensis	2	6003	6.003	0.6003	1.37705	1.50705	0.0566063	0.0411004	0.0285069	0.0206982
7	7	P. durangensis	3	8118.5	8.1185	0.81185	2.1889	2.3189	0.169779	0.113173	0.0855007	0.0569937
7	7	P. durangensis	4	12813	12.813	1.2813	3.4702	3.6002	0.520977	0.351198	0.262364	0.176863
7	7	P. durangensis	5	12684.5	12.6845	1.26845	4.73865	4.86865	1.1244	0.603421	0.566247	0.303883
7	7	P. durangensis	6	14609	14.609	1.4609	6.19955	6.32955	2.19479	1.07039	1.10529	0.539047
7	7	P. durangensis	7	10350.5	10.3505	1.03505	7.2346	7.3646	3.22881	1.03403	1.62603	0.520736
8	8	P. durangensis	1	4368	4.368	0.4368	0.4368	0.5768	0.00489502	0.00489502	0.00246513	0.00246513
8	8	P. durangensis	2	6302	6.302	0.6302	1.067	1.207	0.0321446	0.0272496	0.016188	0.0137229
8	8	P. durangensis	3	11516	11.516	1.1516	2.2186	2.3586	0.177286	0.145141	0.0892812	0.0730932
8	8	P. durangensis	4	18600	18.6	1.86	4.0786	4.2186	0.780337	0.603051	0.392978	0.303696
8	8	P. durangensis	5	21488.5	21.4885	2.14885	6.22745	6.36745	2.22844	1.4481	1.12224	0.729263
8	8	P. durangensis	6	13961	13.961	1.3961	7.62355	7.76355	3.69351	1.46507	1.86005	0.737809
8	8	P. durangensis	7	11062.5	11.0625	1.10625	8.7298	8.8698	5.18676	1.49325	2.61205	0.752
9	9	P. durangensis	1	4064	4.064	0.4064	0.4064	0.5464	0.00426403	0.00426403	0.00214737	0.00214737
9	9	P. durangensis	2	8685	8.685	0.8685	1.2749	1.4149	0.0481973	0.0439333	0.0242722	0.0221248
9	9	P. durangensis	3	12790.5	12.7905	1.27905	2.55395	2.69395	0.248788	0.200591	0.12529	0.101018
9	9	P. durangensis	4	14403	14.403	1.4403	3.99425	4.13425	0.741182	0.492394	0.373259	0.24797
9	9	P. durangensis	5	19444	19.444	1.9444	5.93865	6.07865	1.9798	1.23861	0.997026	0.623766
9	9	P. durangensis	6	14580	14.58	1.458	7.39665	7.53665	3.42456	1.44477	1.72461	0.727584
9	9	P. durangensis	7	11252.5	11.2525	1.12525	8.5219	8.6619	4.88249	1.45793	2.45882	0.734213
10	10	P. durangensis	1	4189	4.189	0.4189	0.4189	0.6189	0.00585781	0.00585781	0.00294999	0.00294999
10	10	P. durangensis	2	7456	7.456	0.7456	1.1645	1.3645	0.0439414	0.0380836	0.0221289	0.0191789
10	10	P. durangensis	3	14020.5	14.0205	1.40205	2.56655	2.76655	0.266236	0.222294	0.134076	0.111947
10	10	P. durangensis	4	15591	15.591	1.5591	4.12565	4.32565	0.831804	0.565568	0.418896	0.28482
10	10	P. durangensis	5	15419	15.419	1.5419	5.66755	5.86755	1.80924	0.977435	0.911132	0.492236
10	10	P. durangensis	6	15101.5	15.1015	1.51015	7.1777	7.3777	3.24347	1.43423	1.63341	0.72228
10	10	P. durangensis	7	8759	8.759	0.8759	8.0536	8.2536	4.31712	1.07365	2.1741	0.540688
11	11	P. durangensis	1	5950	5.95	0.595	0.595	0.735	0.00907917	0.00907917	0.00457227	0.00457227
11	11	P. durangensis	2	14021	14.021	1.4021	1.9971	2.1371	0.137883	0.128804	0.0694379	0.0648656
11	11	P. durangensis	3	13991	13.991	1.3991	3.3962	3.5362	0.497696	0.359813	0.250639	0.181202
11	11	P. durangensis	4	14929.5	14.9295	1.49295	4.88915	5.02915	1.2213	0.723605	0.615047	0.364407
11	11	P. durangensis	5	17155	17.155	1.7155	6.60465	6.74465	2.58051	1.35921	1.29954	0.684496
11	11	P. durangensis	6	15129	15.129	1.5129	8.11755	8.25755	4.32238	1.74188	2.17675	0.87721
11	11	P. durangensis	7	15388.5	15.3885	1.53885	9.6564	9.7964	6.68164	2.35926	3.36488	1.18812
12	12	P. durangensis	1	5816	5.816	0.5816	0.5816	0.7316	0.00897251	0.00897251	0.00451856	0.00451856
12	12	P. durangensis	2	11288.5	11.2885	1.12885	1.71045	1.86045	0.0968401	0.0878676	0.0487687	0.0442501
12	12	P. durangensis	3	11586	11.586	1.1586	2.86905	3.01905	0.332619	0.235778	0.167507	0.118738
12	12	P. durangensis	4	9630	9.63	0.963	3.83205	3.98205	0.673605	0.340986	0.339227	0.171721
12	12	P. durangensis	5	17339.5	17.3395	1.73395	5.566	5.716	1.6925	1.0189	0.852345	0.513118
12	12	P. durangensis	6	14606.5	14.6065	1.46065	7.02665	7.17665	3.02292	1.33041	1.52234	0.669997
12	12	P. durangensis	7	10452	10.452	1.0452	8.07185	8.22185	4.27491	1.252	2.15285	0.630505
13	13	P. durangensis	1	6656.5	6.6565	0.66565	0.66565	0.77565	0.0104144	0.0104144	0.00524468	0.00524468
13	13	P. durangensis	2	6899	6.899	0.6899	1.35555	1.46555	0.0527176	0.0423032	0.0265486	0.0213039
13	13	P. durangensis	3	6151	6.151	0.6151	1.97065	2.08065	0.128789	0.0760714	0.0648581	0.0383096
13	13	P. durangensis	4	5761.5	5.7615	0.57615	2.5468	2.6568	0.240137	0.111348	0.120933	0.0560748
13	13	P. durangensis	5	10714.5	10.7145	1.07145	3.61825	3.72825	0.569515	0.329378	0.286808	0.165875
13	13	P. durangensis	6	15794	15.794	1.5794	5.19765	5.30765	1.40115	0.831633	0.705618	0.41881
13	13	P. durangensis	7	15673.5	15.6735	1.56735	6.765	6.875	2.70953	1.30838	1.36452	0.6589
14	14	P. durangensis	1	2345.5	2.3455	0.23455	0.23455	0.33455	0.00122124	0.00122124	0.000615014	0.000615014
14	14	P. durangensis	2	8742.5	8.7425	0.87425	1.1088	1.2088	0.032267	0.0310457	0.0162496	0.0156346
14	14	P. durangensis	3	10305.5	10.3055	1.03055	2.13935	2.23935	0.155326	0.123059	0.0782221	0.0619725
14	14	P. durangensis	4	8346.5	8.3465	0.83465	2.974	3.074	0.348267	0.192941	0.175387	0.0971653
14	14	P. durangensis	5	10436	10.436	1.0436	4.0176	4.1176	0.733598	0.385331	0.36944	0.194053
14	14	P. durangensis	6	11806.5	11.8065	1.18065	5.19825	5.29825	1.39483	0.661234	0.702437	0.332997
14	14	P. durangensis	7	10867.5	10.8675	1.08675	6.285	6.385	2.24413	0.849294	1.13014	0.427704
15	15	P. durangensis	1	3277.5	3.2775	0.32775	0.32775	0.49775	0.00336198	0.00336198	0.00169309	0.00169309
15	15	P. durangensis	2	5841.5	5.8415	0.58415	0.9119	1.0819	0.0243214	0.0209595	0.0122483	0.0105552
15	15	P. durangensis	3	13293.5	13.2935	1.32935	2.24125	2.41125	0.187548	0.163226	0.0944491	0.0822008
15	15	P. durangensis	4	16795.5	16.7955	1.67955	3.9208	4.0908	0.721489	0.533942	0.363342	0.268893
15	15	P. durangensis	5	22301.5	22.3015	2.23015	6.15095	6.32095	2.18719	1.4657	1.10147	0.738128
15	15	P. durangensis	6	16143.5	16.1435	1.61435	7.7653	7.9353	3.90535	1.71816	1.96674	0.865265
15	15	P. durangensis	7	12513.5	12.5135	1.25135	9.01665	9.18665	5.67215	1.7668	2.8565	0.889762
16	16	P. durangensis	1	1801	1.801	0.1801	0.1801	0.3001	0.000925782	0.000925782	0.000466224	0.000466224
16	16	P. durangensis	2	8795.5	8.7955	0.87955	1.05965	1.17965	0.0303206	0.0293948	0.0152694	0.0148032
16	16	P. durangensis	3	13383.5	13.3835	1.33835	2.398	2.518	0.209442	0.179121	0.105475	0.0902056
16	16	P. durangensis	4	10880.5	10.8805	1.08805	3.48605	3.60605	0.523137	0.313695	0.263452	0.157977
16	16	P. durangensis	5	24022.5	24.0225	2.40225	5.8883	6.0083	1.92192	1.39878	0.967879	0.704427
16	16	P. durangensis	6	22306.5	22.3065	2.23065	8.11895	8.23895	4.29761	2.37569	2.16428	1.1964
16	16	P. durangensis	7	11192	11.192	1.1192	9.23815	9.35815	5.94596	1.64835	2.99439	0.830109
1	17	P. cooperi	1	5176.5	5.1765	0.51765	0.51765	0.59765	0.00535872	0.00535872	0.00266007	0.00266007
1	17	P. cooperi	2	5078	5.078	0.5078	1.02545	1.10545	0.0256936	0.0203349	0.0127543	0.0100943
1	17	P. cooperi	3	9686.5	9.6865	0.96865	1.9941	2.0741	0.127758	0.102065	0.0634191	0.0506648
1	17	P. cooperi	4	11013.5	11.0135	1.10135	3.09545	3.17545	0.378316	0.250558	0.187796	0.124377
1	17	P. cooperi	5	11314.5	11.3145	1.13145	4.2269	4.3069	0.822645	0.444329	0.408361	0.220565
1	17	P. cooperi	6	9834	9.834	0.9834	5.2103	5.2903	1.3895	0.566859	0.68975	0.281389
1	17	P. cooperi	7	6141.5	6.1415	0.61415	5.82445	5.90445	1.83838	0.448876	0.912572	0.222822
2	18	P. cooperi	1	2135	2.135	0.2135	0.2135	0.2935	0.000874767	0.000874767	0.000434235	0.000434235
2	18	P. cooperi	2	2842.5	2.8425	0.28425	0.49775	0.57775	0.00491559	0.00404083	0.0024401	0.00200587
2	18	P. cooperi	3	7550	7.55	0.755	1.25275	1.33275	0.0413821	0.0364665	0.0205421	0.018102
2	18	P. cooperi	4	8015	8.015	0.8015	2.05425	2.13425	0.137415	0.0960327	0.0682127	0.0476706
2	18	P. cooperi	5	10141.5	10.1415	1.01415	3.0684	3.1484	0.370156	0.232741	0.183745	0.115533
2	18	P. cooperi	6	15917	15.917	1.5917	4.6601	4.7401	1.05027	0.680112	0.521353	0.337608
2	18	P. cooperi	7	13548.5	13.5485	1.35485	6.01495	6.09495	1.99336	0.943088	0.989502	0.468149
3	19	P. cooperi	1	4190	4.19	0.419	0.419	0.569	0.00472806	0.00472806	0.00234701	0.00234701
3	19	P. cooperi	2	3545	3.545	0.3545	0.7735	0.9235	0.0162465	0.0115184	0.00806474	0.00571773
3	19	P. cooperi	3	9138.5	9.1385	0.91385	1.68735	1.83735	0.0938049	0.0775584	0.0465647	0.0385
3	19	P. cooperi	4	11509	11.509	1.1509	2.83825	2.98825	0.324038	0.230233	0.160852	0.114288
3	19	P. cooperi	5	18913.5	18.9135	1.89135	4.7296	4.8796	1.13085	0.806817	0.561356	0.400504
3	19	P. cooperi	6	14974	14.974	1.4974	6.227	6.377	2.23697	1.10611	1.11043	0.549074
3	19	P. cooperi	7	11118	11.118	1.1118	7.3388	7.4888	3.36942	1.13245	1.67258	0.562149
4	20	P. cooperi	1	4056	4.056	0.4056	0.4056	0.5056	0.00349878	0.00349878	0.00173679	0.00173679
4	20	P. cooperi	2	4950.5	4.9505	0.49505	0.90065	1.00065	0.019933	0.0164342	0.00989473	0.00815794
4	20	P. cooperi	3	13726	13.726	1.3726	2.27325	2.37325	0.180106	0.160173	0.0894047	0.07951
4	20	P. cooperi	4	9534	9.534	0.9534	3.22665	3.32665	0.425936	0.24583	0.211435	0.12203
4	20	P. cooperi	5	14762.5	14.7625	1.47625	4.7029	4.8029	1.0861	0.660162	0.539139	0.327705
4	20	P. cooperi	6	12226.5	12.2265	1.22265	5.92555	6.02555	1.93601	0.849916	0.961038	0.421898
4	20	P. cooperi	7	9109	9.109	0.9109	6.83645	6.93645	2.77168	0.835669	1.37586	0.414826
5	21	P. cooperi	1	4870	4.87	0.487	0.487	0.607	0.00557499	0.00557499	0.00276743	0.00276743
5	21	P. cooperi	2	6731.5	6.7315	0.67315	1.16015	1.28015	0.0373456	0.0317706	0.0185384	0.0157709
5	21	P. cooperi	3	8871.5	8.8715	0.88715	2.0473	2.1673	0.142904	0.105558	0.0709374	0.052399
5	21	P. cooperi	4	13099.5	13.0995	1.30995	3.35725	3.47725	0.476821	0.333917	0.236694	0.165756
5	21	P. cooperi	5	15354.5	15.3545	1.53545	4.8927	5.0127	1.21114	0.734323	0.601212	0.364518
5	21	P. cooperi	6	14283	14.283	1.4283	6.321	6.441	2.29463	1.08349	1.13906	0.537844
5	21	P. cooperi	7	9264.5	9.2645	0.92645	7.24745	7.36745	3.232	0.937365	1.60436	0.465308
6	22	P. cooperi	1	4493.5	4.4935	0.44935	0.44935	0.58935	0.00517107	0.00517107	0.00256692	0.00256692
6	22	P. cooperi	2	6665	6.665	0.6665	1.11585	1.25585	0.0355652	0.0303942	0.0176546	0.0150877
6	22	P. cooperi	3	3393.5	3.3935	0.33935	1.4552	1.5952	0.0654317	0.0298665	0.0324803	0.0148257
6	22	P. cooperi	4	11643.5	11.6435	1.16435	2.61955	2.75955	0.264522	0.19909	0.131309	0.0988284
6	22	P. cooperi	5	18878.5	18.8785	1.88785	4.5074	4.6474	0.998707	0.734185	0.495758	0.364449
6	22	P. cooperi	6	18866	18.866	1.8866	6.394	6.534	2.38003	1.38132	1.18144	0.685687
6	22	P. cooperi	7	16543.5	16.5435	1.65435	8.04835	8.18835	4.23066	1.85063	2.1001	0.918655
7	23	P. cooperi	1	5824.5	5.8245	0.58245	0.58245	0.72245	0.00868925	0.00868925	0.00431334	0.00431334
7	23	P. cooperi	2	9817.5	9.8175	0.98175	1.5642	1.7042	0.0774377	0.0687485	0.0384401	0.0341268
7	23	P. cooperi	3	14086	14.086	1.4086	2.9728	3.1128	0.359581	0.282143	0.178496	0.140056
7	23	P. cooperi	4	15978.5	15.9785	1.59785	4.57065	4.71065	1.03372	0.674136	0.513137	0.334641
7	23	P. cooperi	5	21195	21.195	2.1195	6.69015	6.83015	2.6647	1.63099	1.32276	0.809622
7	23	P. cooperi	6	19372	19.372	1.9372	8.62735	8.76735	5.03542	2.37072	2.49958	1.17682
7	23	P. cooperi	7	12379.5	12.3795	1.23795	9.8653	10.0053	7.05082	2.0154	3.50003	1.00044
8	24	P. cooperi	1	6816.5	6.8165	0.68165	0.68165	0.82165	0.0120617	0.0120617	0.00598741	0.00598741
8	24	P. cooperi	2	8566	8.566	0.8566	1.53825	1.67825	0.0744677	0.062406	0.0369657	0.0309783
8	24	P. cooperi	3	12305	12.305	1.2305	2.76875	2.90875	0.302516	0.228048	0.150169	0.113203
8	24	P. cooperi	4	16279	16.279	1.6279	4.39665	4.53665	0.939161	0.636645	0.466199	0.316031
8	24	P. cooperi	5	19231	19.231	1.9231	6.31975	6.45975	2.3117	1.37254	1.14753	0.681327
8	24	P. cooperi	6	15215	15.215	1.5215	7.84125	7.98125	3.96325	1.65155	1.96736	0.819831
8	24	P. cooperi	7	12651	12.651	1.2651	9.10635	9.24635	5.76658	1.80333	2.86253	0.895173
9	25	P. cooperi	1	4441.5	4.4415	0.44415	0.44415	0.57415	0.0048379	0.0048379	0.00240153	0.00240153
9	25	P. cooperi	2	10149	10.149	1.0149	1.45905	1.58905	0.0647907	0.0599528	0.0321621	0.0297606
9	25	P. cooperi	3	12455.5	12.4555	1.24555	2.7046	2.8346	0.283246	0.218456	0.140603	0.108441
9	25	P. cooperi	4	12628	12.628	1.2628	3.9674	4.0974	0.72446	0.441214	0.359622	0.219019
9	25	P. cooperi	5	22408	22.408	2.2408	6.2082	6.3382	2.20244	1.47798	1.09329	0.733669
9	25	P. cooperi	6	18212.5	18.2125	1.82125	8.02945	8.15945	4.19271	1.99027	2.08126	0.987968
9	25	P. cooperi	7	12322.5	12.3225	1.23225	9.2617	9.3917	6.00045	1.80774	2.97862	0.897362
10	26	P. cooperi	1	4600.5	4.6005	0.46005	0.46005	0.63005	0.00613056	0.00613056	0.00304321	0.00304321
10	26	P. cooperi	2	12109.5	12.1095	1.21095	1.671	1.841	0.0942806	0.08815	0.0468009	0.0437577
10	26	P. cooperi	3	15049	15.049	1.5049	3.1759	3.3459	0.432247	0.337966	0.214567	0.167766
10	26	P. cooperi	4	12392	12.392	1.2392	4.4151	4.5851	0.964937	0.53269	0.478995	0.264427
10	26	P. cooperi	5	17650.5	17.6505	1.76505	6.18015	6.35015	2.21304	1.2481	1.09855	0.619557
10	26	P. cooperi	6	17805.5	17.8055	1.78055	7.9607	8.1307	4.15515	1.94212	2.06262	0.964067
10	26	P. cooperi	7	13913	13.913	1.3913	9.352	9.522	6.21492	2.05976	3.08509	1.02247
11	27	P. cooperi	1	7585	7.585	0.7585	0.7585	0.9085	0.0155823	0.0155823	0.00773506	0.00773506
11	27	P. cooperi	2	11477	11.477	1.1477	1.9062	2.0562	0.124967	0.109384	0.0620334	0.0542984
11	27	P. cooperi	3	16785	16.785	1.6785	3.5847	3.7347	0.57203	0.447063	0.283955	0.221922
11	27	P. cooperi	4	16485.5	16.4855	1.64855	5.23325	5.38325	1.45258	0.880548	0.72106	0.437104
11	27	P. cooperi	5	18580.5	18.5805	1.85805	7.0913	7.2413	3.09281	1.64023	1.53527	0.814212
11	27	P. cooperi	6	13643	13.643	1.3643	8.4556	8.6056	4.80201	1.7092	2.38372	0.848447
11	27	P. cooperi	7	8953.5	8.9535	0.89535	9.35095	9.50095	6.17996	1.37795	3.06773	0.684013
12	28	P. cooperi	1	7965.5	7.9655	0.79655	0.79655	0.94655	0.0173001	0.0173001	0.00858775	0.00858775
12	28	P. cooperi	2	10935	10.935	1.0935	1.89005	2.04005	0.12248	0.10518	0.0607991	0.0522114
12	28	P. cooperi	3	15030	15.03	1.503	3.39305	3.54305	0.500156	0.377676	0.248278	0.187479
12	28	P. cooperi	4	14104	14.104	1.4104	4.80345	4.95345	1.17499	0.674833	0.583265	0.334987
12	28	P. cooperi	5	17093	17.093	1.7093	6.51275	6.66275	2.50139	1.3264	1.24169	0.658424
12	28	P. cooperi	6	12135	12.135	1.2135	7.72625	7.87625	3.83171	1.33032	1.90206	0.66037
12	28	P. cooperi	7	10224.5	10.2245	1.02245	8.7487	8.8987	5.22994	1.39823	2.59614	0.694083
13	29	P. cooperi	1	3934.5	3.9345	0.39345	0.39345	0.55345	0.00440566	0.00440566	0.00218697	0.00218697
13	29	P. cooperi	2	7932.5	7.9325	0.79325	1.1867	1.3467	0.0424951	0.0380894	0.0210946	0.0189076
13	29	P. cooperi	3	11610	11.61	1.161	2.3477	2.5077	0.207265	0.16477	0.102887	0.081792
13	29	P. cooperi	4	10694	10.694	1.0694	3.4171	3.5771	0.512499	0.305234	0.254405	0.151518
13	29	P. cooperi	5	15443	15.443	1.5443	4.9614	5.1214	1.27921	0.766714	0.635002	0.380597
13	29	P. cooperi	6	16667	16.667	1.6667	6.6281	6.7881	2.62309	1.34388	1.3021	0.6671
13	29	P. cooperi	7	14568.5	14.5685	1.45685	8.08495	8.24495	4.30559	1.68251	2.1373	0.835196
14	30	P. cooperi	1	4398.5	4.3985	0.43985	0.43985	0.53985	0.00413495	0.00413495	0.00205259	0.00205259
14	30	P. cooperi	2	4822	4.822	0.4822	0.92205	1.02205	0.0210376	0.0169026	0.0104431	0.00839046
14	30	P. cooperi	3	5977.5	5.9775	0.59775	1.5198	1.6198	0.0680344	0.0469968	0.0337723	0.0233292
14	30	P. cooperi	4	6685.5	6.6855	0.66855	2.18835	2.28835	0.164136	0.0961017	0.0814771	0.0477049
14	30	P. cooperi	5	15024.5	15.0245	1.50245	3.6908	3.7908	0.594186	0.43005	0.294954	0.213477
14	30	P. cooperi	6	9323	9.323	0.9323	4.6231	4.7231	1.04069	0.446509	0.516601	0.221647
14	30	P. cooperi	7	8431.5	8.4315	0.84315	5.46625	5.56625	1.58177	0.541076	0.785191	0.26859
15	31	P. cooperi	1	6918	6.918	0.6918	0.6918	0.8418	0.01283	0.01283	0.0063688	0.0063688
15	31	P. cooperi	2	12638.5	12.6385	1.26385	1.95565	2.10565	0.13277	0.11994	0.065907	0.0595382
15	31	P. cooperi	3	13499.5	13.4995	1.34995	3.3056	3.4556	0.46929	0.33652	0.232956	0.167049
15	31	P. cooperi	4	10415.5	10.4155	1.04155	4.34715	4.49715	0.918459	0.449169	0.455923	0.222967
15	31	P. cooperi	5	16114	16.114	1.6114	5.95855	6.10855	2.00471	1.08625	0.995139	0.539216
15	31	P. cooperi	6	11984.5	11.9845	1.19845	7.157	7.307	3.16484	1.16012	1.57102	0.575885
15	31	P. cooperi	7	7063	7.063	0.7063	7.8633	8.0133	4.00394	0.839103	1.98756	0.416531
16	32	P. cooperi	1	6418	6.418	0.6418	0.6418	0.7818	0.0106261	0.0106261	0.00527481	0.00527481
16	32	P. cooperi	2	16309.5	16.3095	1.63095	2.27275	2.41275	0.187845	0.177219	0.0932464	0.0879716
16	32	P. cooperi	3	18466	18.466	1.8466	4.11935	4.25935	0.799693	0.611848	0.396968	0.303721
16	32	P. cooperi	4	13606	13.606	1.3606	5.47995	5.61995	1.62096	0.821263	0.804642	0.407675
16	32	P. cooperi	5	17657.5	17.6575	1.76575	7.2457	7.3857	3.25244	1.63149	1.61451	0.80987
16	32	P. cooperi	6	16856	16.856	1.6856	8.9313	9.0713	5.49239	2.23994	2.72642	1.11191
16	32	P. cooperi	7	12392	12.392	1.2392	10.1705	10.3105	7.61203	2.11964	3.77861	1.05219
